# Supplementary material
Source: PubMed Central journal article supplement (PMC5004203)
Supplement: NIHMS798930-supplement-Supplemental_information.pdf [file NIHMS798930-supplement-Supplemental_information.pdf]

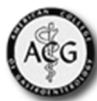

**Volumetric Laser Endomicroscopy Detects Subsquamous  
Barrett's Adenocarcinoma**

|                     |                                             |
|---------------------|---------------------------------------------|
| Journal:            | <i>American Journal of Gastroenterology</i> |
| Manuscript ID:      | AJG-13-1412.R1                              |
| Manuscript Type:    | Letter to the Editor                        |
| Keywords:           | Barrett-s esophagus, Esophagus, Endoscopy   |
| Manuscript Section: | Esophagus, Endoscopy                        |
|                     |                                             |

SCHOLARONE™  
Manuscripts

Review

## Volumetric Laser Endomicroscopy Detects Subsquamous Barrett's Adenocarcinoma

Cadman L. Leggett MD<sup>1</sup>, Emmanuel Gorospe MD<sup>1</sup>, Victoria L. Owens MD<sup>2</sup>, Marlys Anderson BS<sup>1</sup>, Lori Lutzke CCRP<sup>1</sup>, Kenneth K. Wang MD<sup>1</sup>

1 Division of Gastroenterology and Hepatology, Mayo Clinic, Rochester, Minnesota

2 Division of Gastroenterology and Liver Pathology, Mayo Clinic, Rochester, Minnesota

A 74 year-old patient with Barrett's esophagus (BE) (C5M5) enrolled in a surveillance program was found to have intramucosal adenocarcinoma (IMC) arising in the background of high-grade dysplasia at the gastroesophageal junction. He was treated with a combination of endoscopic mucosal resection (EMR) and radiofrequency ablation (RFA) and achieved complete eradication of intestinal metaplasia.

Surveillance biopsies obtained a year following his last RFA treatment showed moderately differentiated IMC identified under squamous epithelium (SE) at a site close in location to his previous cancer. This was not seen on high resolution white light endoscopy and was only detected on mapping biopsies. A subsequent EMR was performed over an area of normal appearing mucosa corresponding to the prior biopsy site. Histopathology demonstrated moderate to poorly differentiated IMC invading into the lamina propria and muscularis mucosa with negative mucosal and submucosal margins for cancer.

**(Figure 1)** Endoscopic ultrasound did not show evidence of esophageal wall thickening or regional lymphadenopathy. Imaging with confocal laser endomicroscopy (CLE) and volumetric laser endomicroscopy (VLE) was performed on the EMR specimen immediately following resection to ensure visualization of identical areas. Surface imaging with CLE using the fluorescent glucose analog 2-NBDG showed a homogenous layer of SE.[1] Cross sectional imaging with VLE demonstrated BE with features suggestive of IMC including increased signal intensity (black arrow) with numerous atypical appearing glands and dilated ducts (white arrows) underneath a layer of SE. **(Figure 2)**

Subsquamous BE is found in approximately 0.9% of surveillance biopsies following RFA.[2] Most of the time, subsquamous BE is non-dysplastic but cancer has clearly been found in multiple series and presents a challenging diagnosis.[3] VLE is a second-generation optical coherence tomography device

that can generate in-vivo three-dimensional views of the human esophagus.[4] Advantages of VLE over CLE is the capacity to perform wide field imaging and the ability to visualize deeper into the mucosa. After ablative therapy for Barrett's esophagus, it is essential to perform careful mapping biopsies of the mucosa to detect these small areas of residual cancer. This is the first case reported where VLE could clearly detect subsquamous Barrett's adenocarcinoma that was not seen by routine while light endoscopy or CLE. The use of in-vivo VLE has the potential to enhance the diagnosis of subsquamous BE and associated neoplasia.

For Peer Review

## REFERENCES:

1. Gorospe, E.C., et al., *Diagnostic performance of two confocal endomicroscopy systems in detecting Barrett's dysplasia: a pilot study using a novel bioprobe in ex vivo tissue*. Gastrointestinal endoscopy, 2012. **76**(5): p. 933-8.
2. Gray, N.A., R.D. Odze, and S.J. Spechler, *Buried metaplasia after endoscopic ablation of Barrett's esophagus: a systematic review*. The American journal of gastroenterology, 2011. **106**(11): p. 1899-908; quiz 1909.
3. Titi, M., et al., *Development of subsquamous high-grade dysplasia and adenocarcinoma after successful radiofrequency ablation of Barrett's esophagus*. Gastroenterology, 2012. **143**(3): p. 564-6 e1.
4. Vakoc, B.J., et al., *Comprehensive esophageal microscopy by using optical frequency-domain imaging (with video)*. Gastrointestinal endoscopy, 2007. **65**(6): p. 898-905.

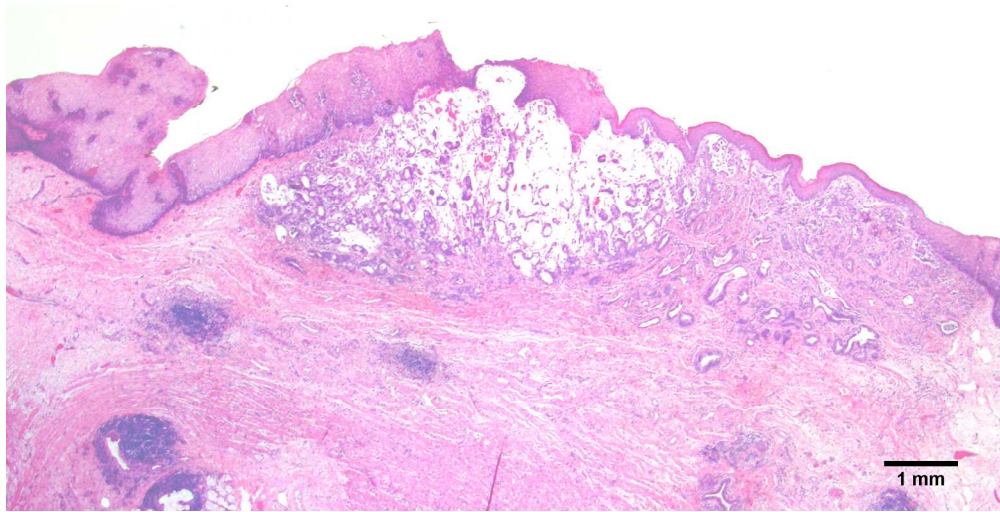

Endoscopic mucosal resection showing subsquamous moderate to poorly differentiated intramucosal adenocarcinoma invading into the lamina propria and muscularis mucosa.  
344x174mm (165 x 165 DPI)

Peer Review

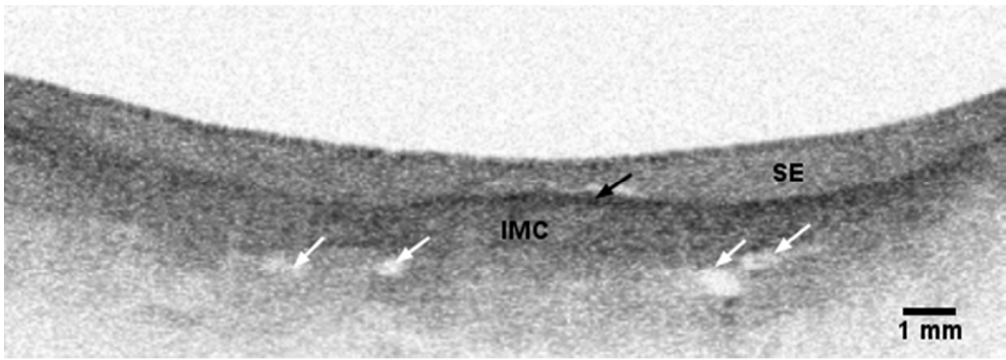

Volumetric laser endomicroscopy of endoscopic mucosal resection with features suggestive of intramucosal adenocarcinoma (IMC) including increased signal intensity (black arrow) with atypical appearing glands and dilated ducts (white arrows) underneath a layer of squamous epithelium (SE)  
194x68mm (72 x 72 DPI)

Peer Review

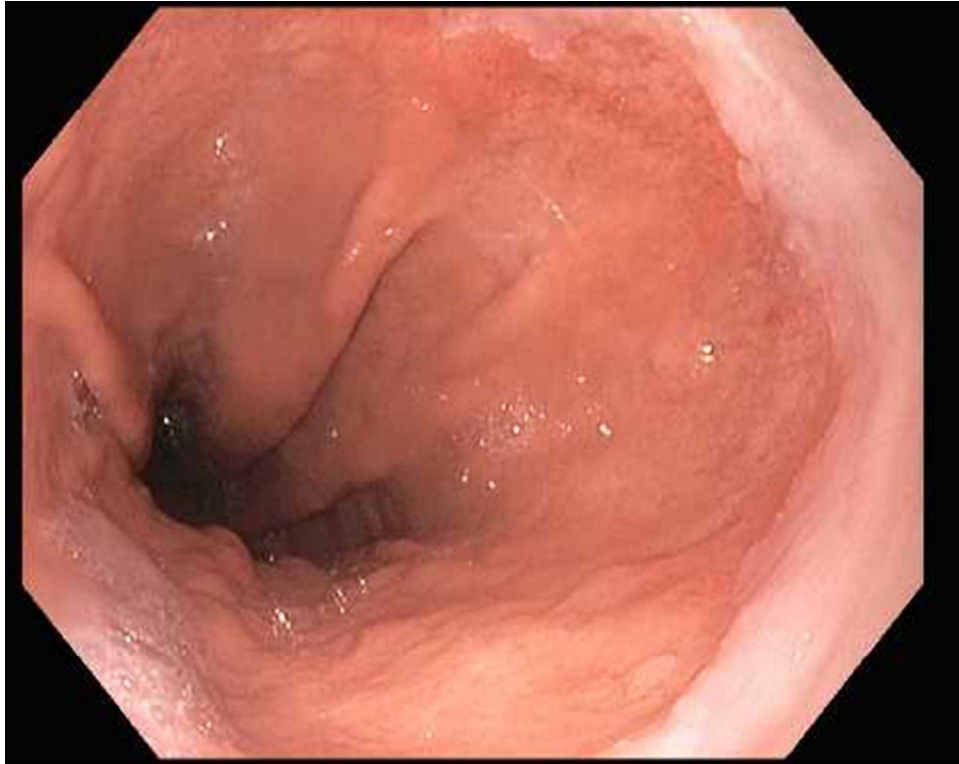

High-definition white light endoscopy of Barrett's esophagus with no mucosal irregularities.  
127x100mm (96 x 96 DPI)

Review

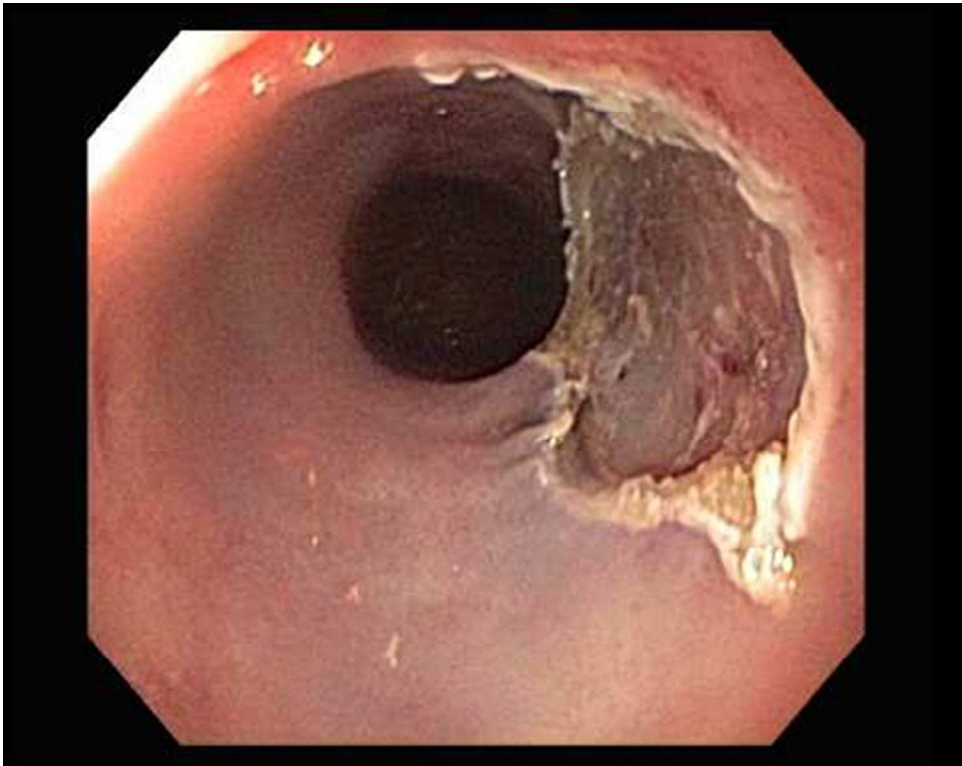

High-definition white light endoscopy image of Barrett' esophagus status-post endoscopic mucosal resection  
127x100mm (96 x 96 DPI)

Review



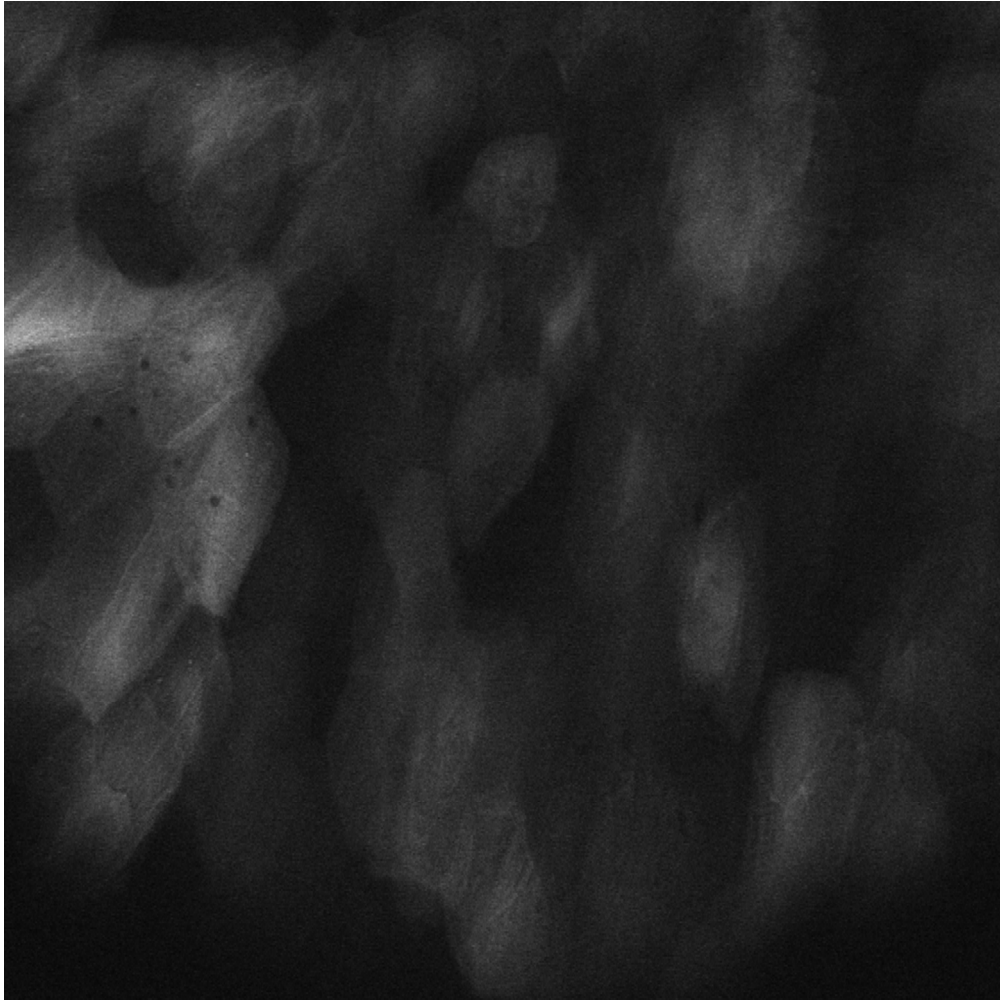

Confocal laser endomicroscopy of endoscopic mucosal resection specimen showing a layer of squamous epithelium with homogenous fluorescence intensity.  
361x361mm (72 x 72 DPI)
